# Supplementary material for: Chronic cold exposure enhances glucose oxidation in brown adipose tissue
Source: PubMed Central journal article supplement (PMC7645266; doi:10.15252/embr.202050085), 2020-10-12
Supplement: EMBR-21-e50085-s002.pdf [file EMBR-21-e50085-s002.pdf]

## Expanded View Figures

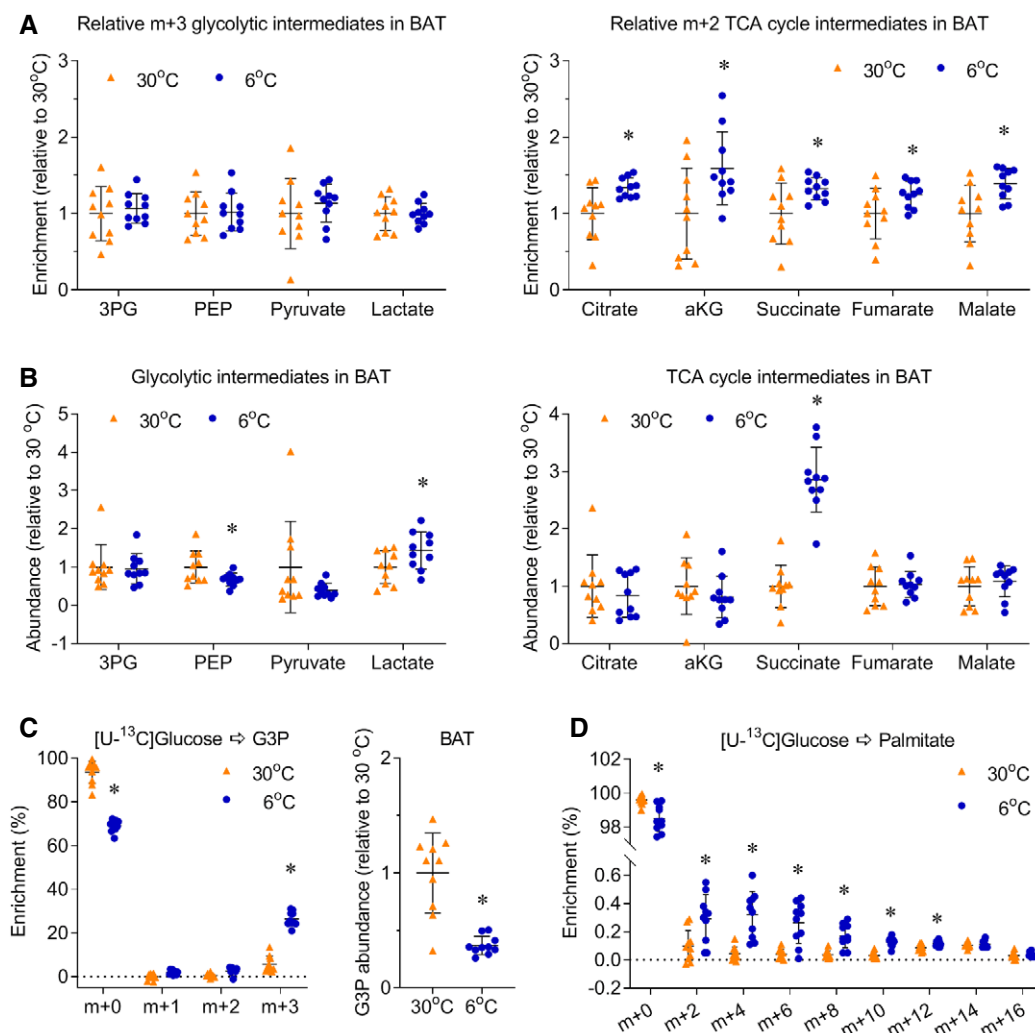**Figure EV1. Chronic cold exposure induces glucose metabolism in BAT.**

Mice, housed at 30°C or 6°C for 10 days, were administered with [U-<sup>13</sup>C]glucose (2 g/kg, IP). 15 minutes after injection, BAT was harvested for metabolic enrichment assay.

**A** To directly compare the change of enrichment between different metabolites, the relative metabolic <sup>13</sup>C enrichments in BAT of male mice are normalized to the average enrichment of each metabolite in 30°C group.

**B** Relative abundance of glycolytic and TCA cycle intermediates in BAT.

**C** The enrichment and relative abundance of glyceraldehyde 3-phosphate (G3P).

**D** The enrichment of palmitate.

Data information:  $n = 10$ , data are represented as the mean  $\pm$  SD. Statistical analysis was performed using two-tailed Student's  $t$ -test,  $*P < 0.05$ .

Source data are available online for this figure.

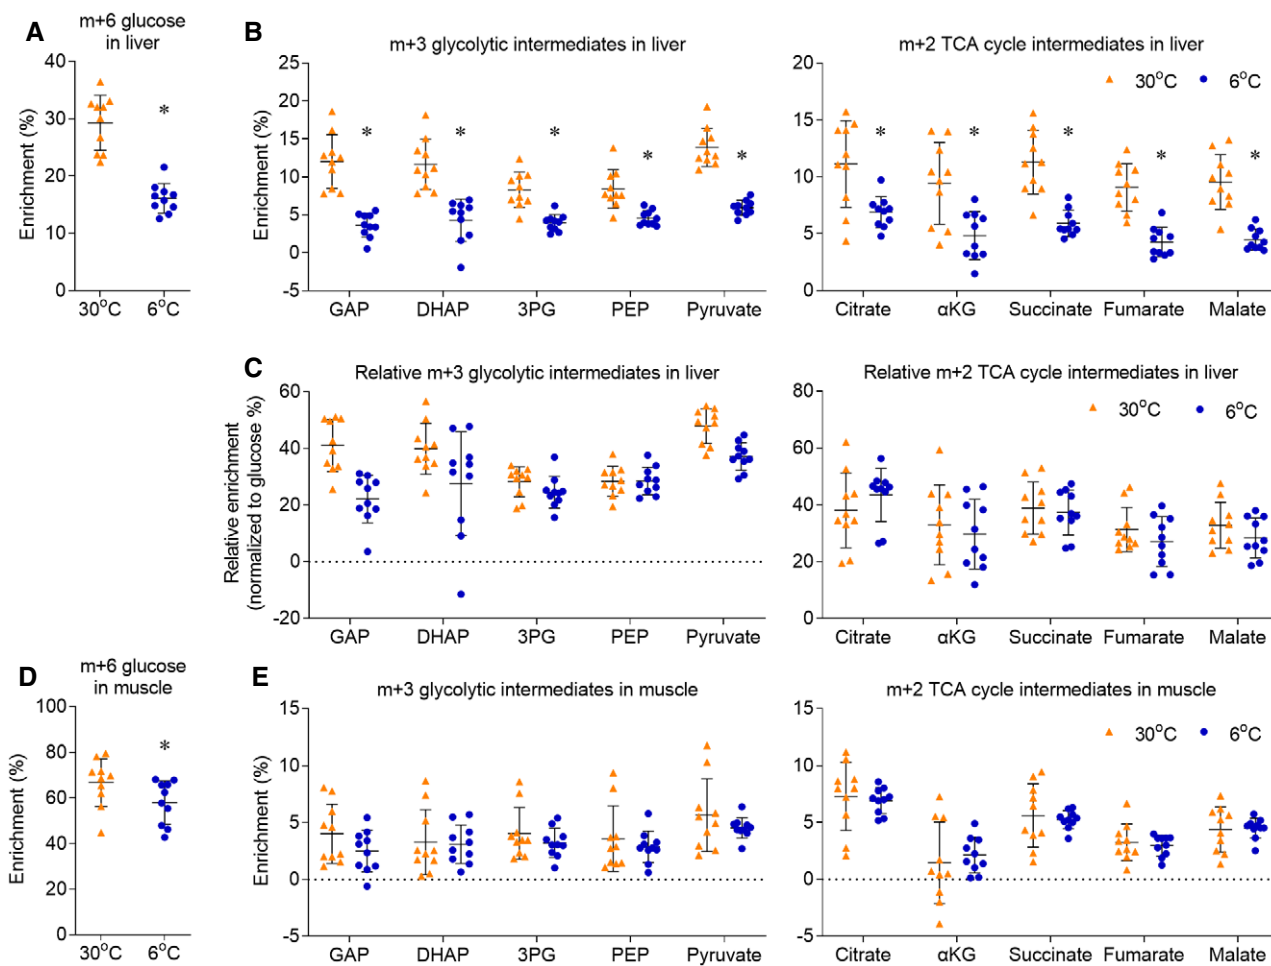

**Figure EV2. Chronic cold exposure does not induce oxidative metabolism in liver or muscle.**

Mice, housed at 30°C or 6°C for 10 days, were administered with [ $^{13}\text{C}$ ]glucose (2 g/kg, IP). 15 minutes after injection, liver and muscle were harvested for metabolic enrichment assay.

A m+6 glucose enrichment in liver.

B Metabolic  $^{13}\text{C}$  enrichments in liver are shown as m+3 glycolysis intermediates, m+2 TCA cycle intermediates. GAP, glyceraldehyde 3-phosphate; DHAP, dihydroxyacetone phosphate.

C After normalizing to the glucose enrichment in the liver of each mouse, the relative metabolic  $^{13}\text{C}$  enrichments were shown as m+3 glycolysis intermediates and m+2 TCA cycle intermediates.

D m+6 glucose enrichment in muscle.

E Metabolic  $^{13}\text{C}$  enrichments in muscle are shown as m+3 glycolysis intermediates, m+2 TCA cycle intermediates.

Data information:  $n = 10$ , data are represented as the mean  $\pm$  SD. Statistical analysis was performed using two-tailed Student's  $t$ -test,  $*P < 0.05$ .

Source data are available online for this figure.

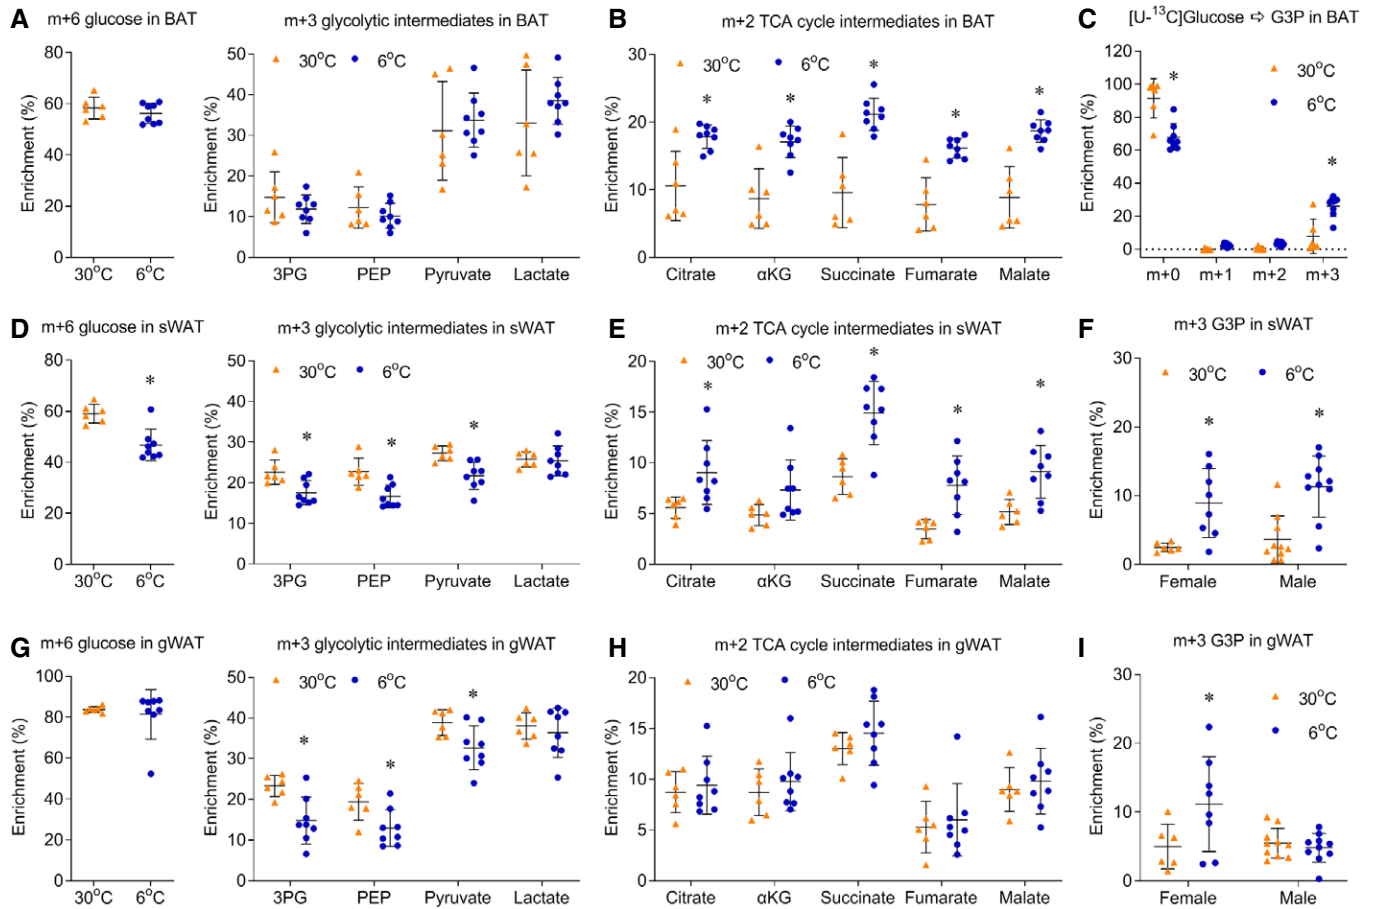

**Figure EV3. Chronic cold exposure induces oxidative metabolism in BAT and sWAT of female mice.**

Mice, housed at 30 or 6°C for 10 days, were administered with [U-<sup>13</sup>C]glucose (2 g/kg, IP). 15 minutes after injection, BAT, sWAT, and gWAT were harvested for metabolic enrichment assay.

A–C Metabolic <sup>13</sup>C enrichments in BAT of female mice are shown as m+6 glucose and m+3 glycolytic intermediates (A), m+2 TCA cycle intermediates (B), and the enrichment of G3P (C).

D, E Metabolic <sup>13</sup>C enrichments in sWAT of female mice are shown as m+6 glucose and m+3 glycolysis intermediates (D), m+2 TCA cycle intermediates (E).

F The m+3 enrichment of G3P in sWAT of both female and male mice.

G, H Metabolic <sup>13</sup>C enrichments in gWAT of female mice are shown as m+6 glucose and m+3 glycolysis intermediates (G), m+2 TCA cycle intermediates (H).

I The m+3 enrichment of G3P in gWAT of both female and male mice.

Data information:  $n = 6–8$  female mice, and  $n = 10$  male mice, data are represented as the mean  $\pm$  SD. Statistical analysis was performed using two-tailed Student's  $t$ -test,  $*P < 0.05$ .

Source data are available online for this figure.

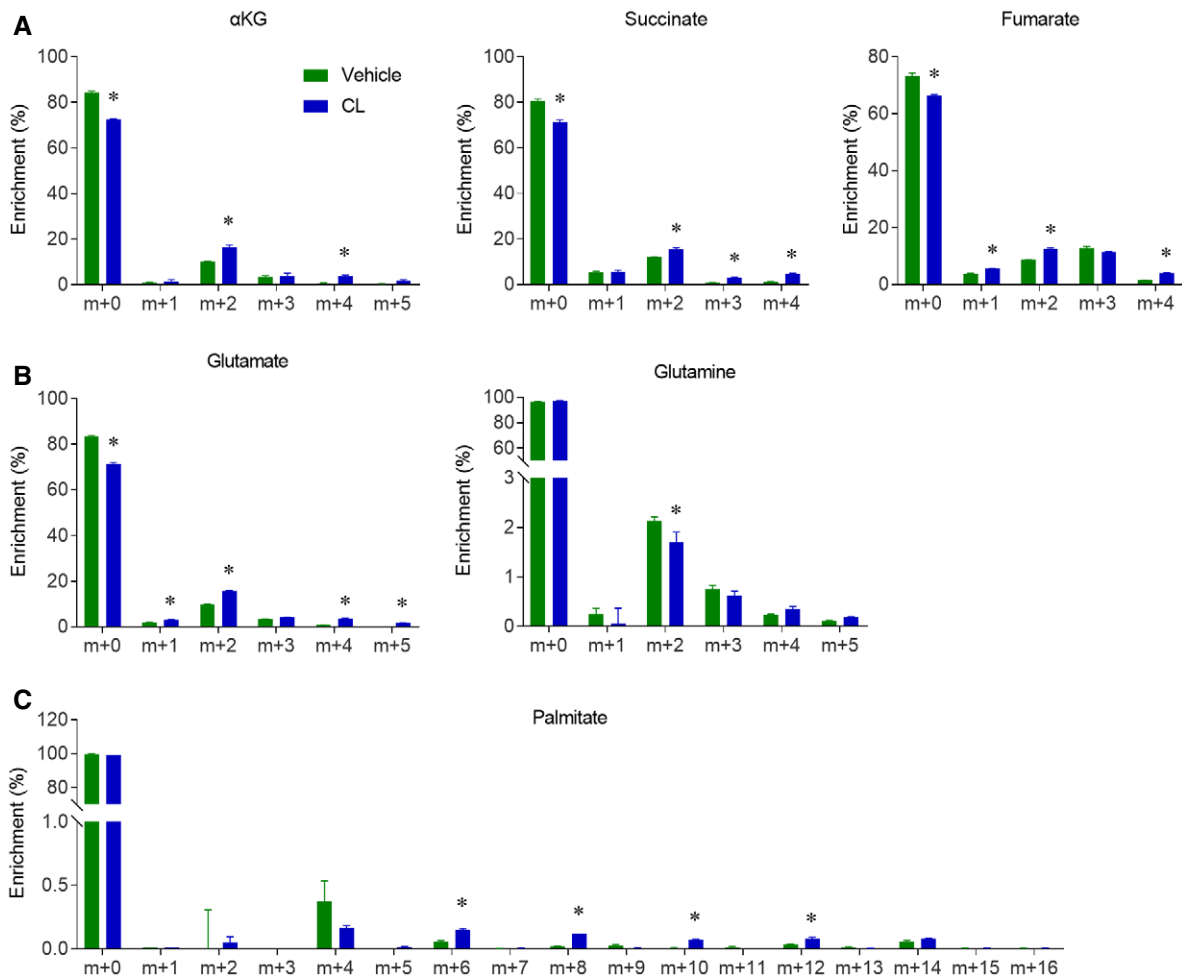

**Figure EV4.  $\beta$ 3-AR agonist activates glucose oxidation in differentiated primary brown adipocytes.**

A–C In the sample [ $U$ - $^{13}C$ ]glucose experiment as shown in Fig 5, the enrichments of other metabolites were used for MFA modeling.  $n = 3$  biological repeats, data are represented as the mean  $\pm$  SD. Statistical analysis was performed using two-way ANOVA followed by Tukey's multiple comparisons test, \* $P < 0.05$ .

Source data are available online for this figure.

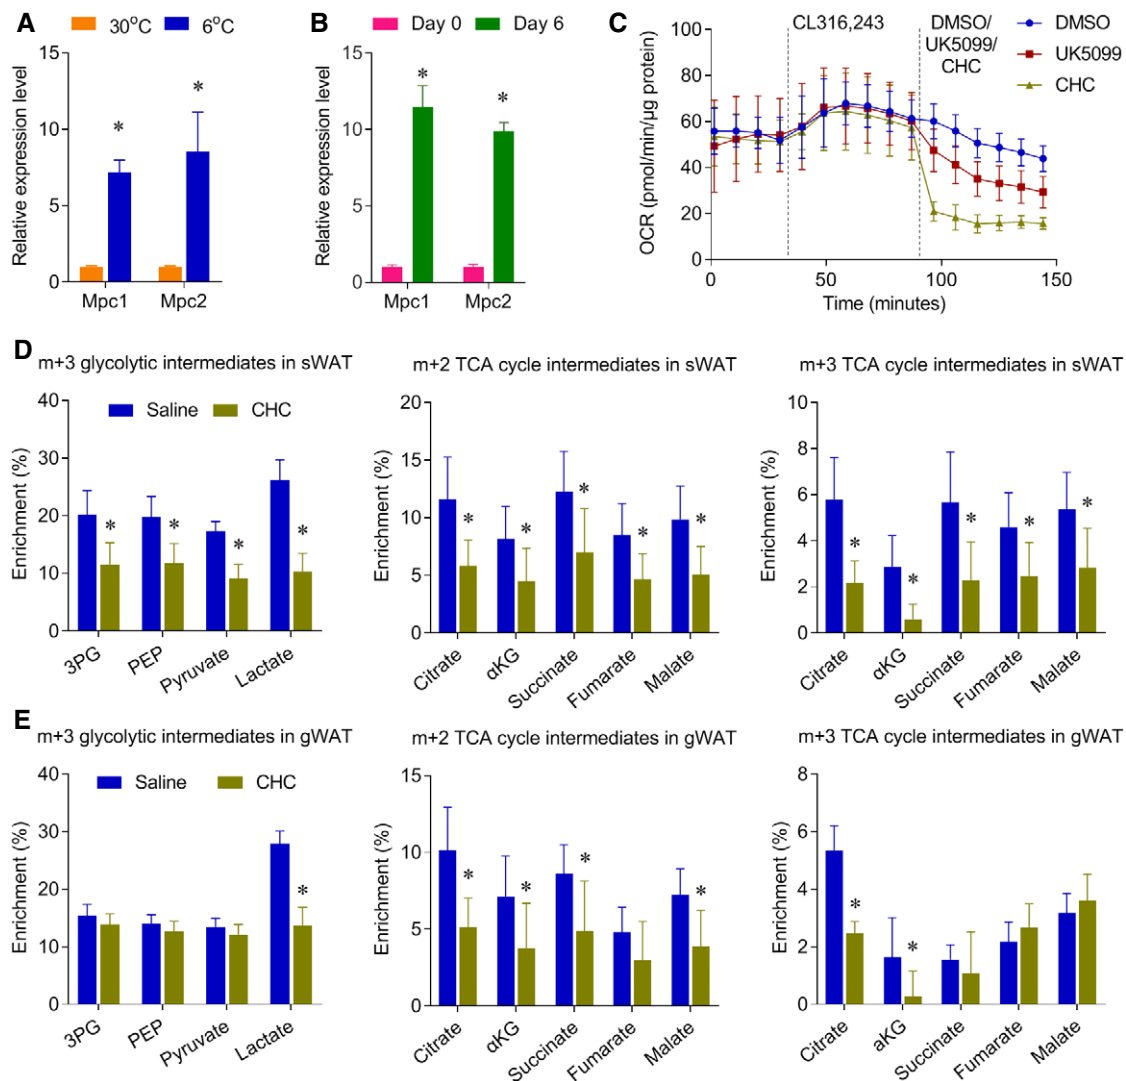

**Figure EV5. CHC represses glucose metabolism in multiple adipose tissues.**

- A Relative mRNA levels of Mpc1/2 expression were measured by qPCR in BAT of the mice, housed at 30 or 6°C for 10 days.  $n = 5-6$  biological replicates.
- B Relative mRNA levels of Mpc1/2 expression were measured by qPCR in the pre-differentiated day 0 and fully differentiated brown adipocytes day 6.  $n = 4$  biological replicates.
- C Oxygen consumption rate (OCR) of mouse brown adipocytes treated with MPC inhibitor CHC (2 mM) or UK5099 (2  $\mu$ M),  $n = 6-7$  biological repeats. CL, CL316,243.
- D, E Mice were housed at 6°C for 10 days, and mice were IP injected with PBS or CHC (500 mg/kg). 30 minutes after CHC treatment, mice were administered with [ $^{13}$ C]glucose (2 g/kg, IP). Metabolic  $^{13}$ C enrichments in sWAT (D) and gWAT (E) of male mice are shown as m+2 and m+3 TCA cycle intermediates.  $n = 7$  biological replicates.

Data information: data are represented as the mean  $\pm$  SD, except that (C) is represented as the mean  $\pm$  SEM. Statistical analysis was performed using two-tailed Student's  $t$ -test, \* $P < 0.05$ .

Source data are available online for this figure.
